# Supplementary material for: Mechanism of action of 4‐substituted phenols to induce vitiligo and antimelanoma immunity
Source: PubMed Central journal article supplement (PMC6850206; doi:10.1111/pcmr.12774), 2019-03-18

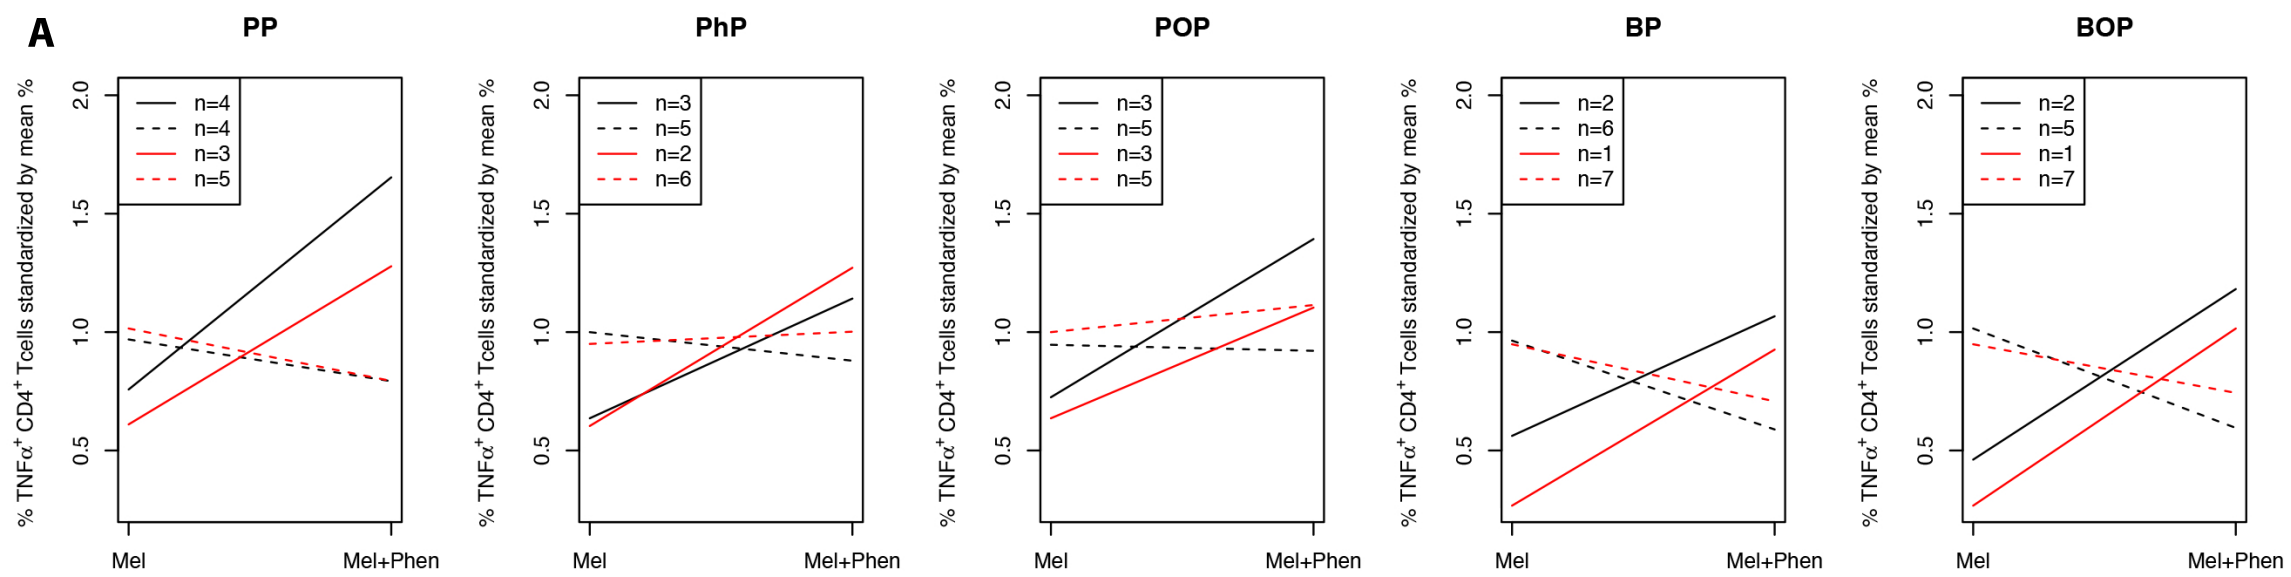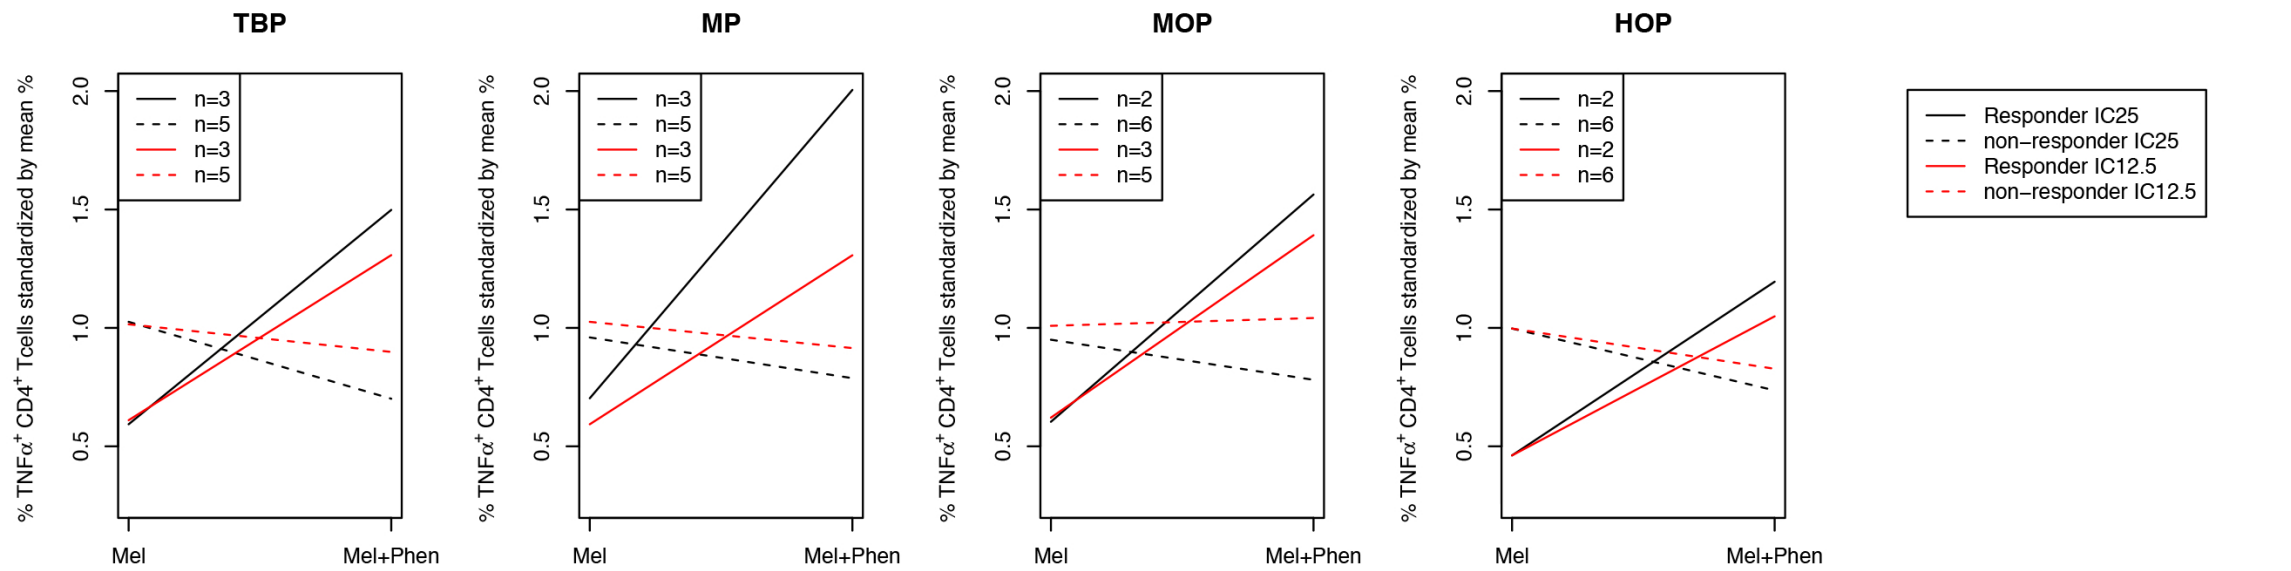

**B****PP**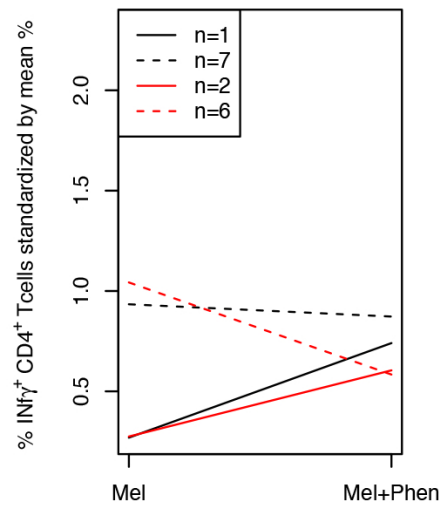**PhP**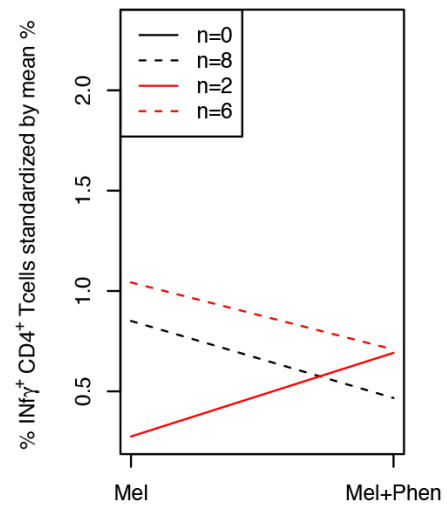**POP**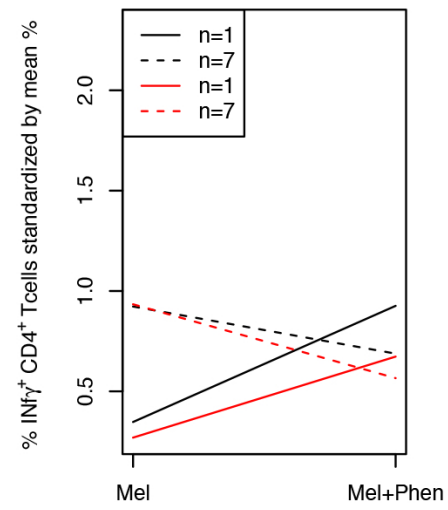**BP**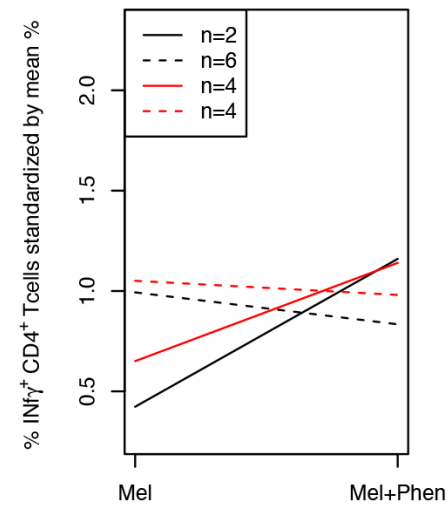**BOP**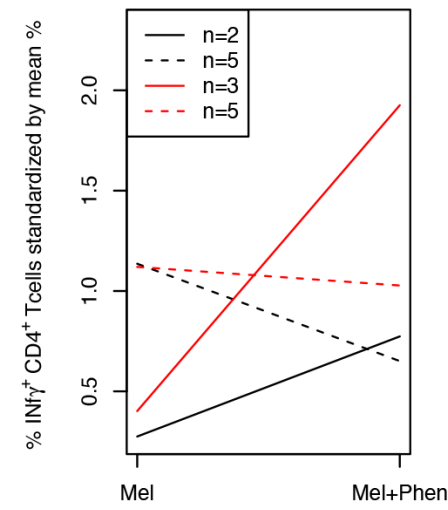**TBP**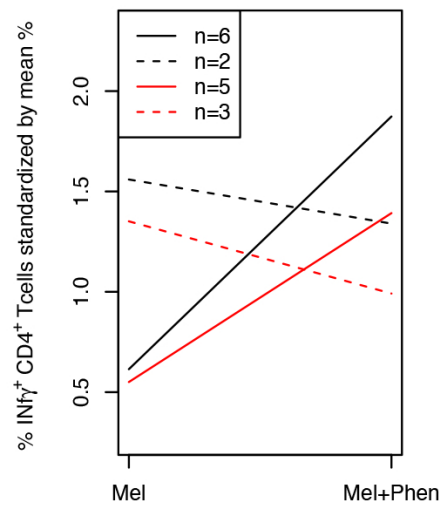**MP**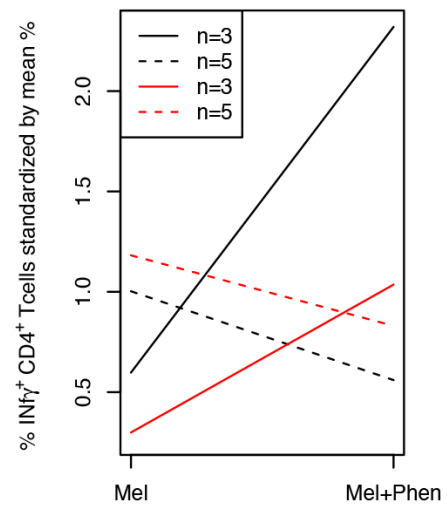**MOP**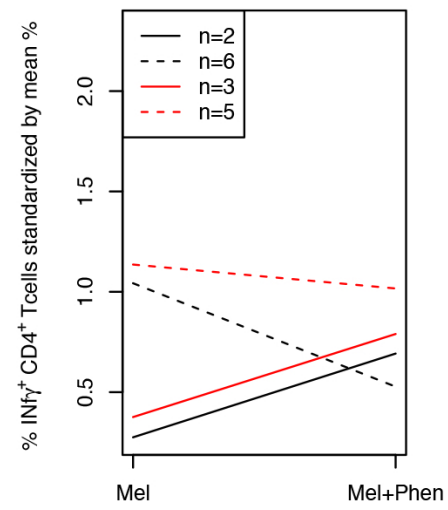**HOP**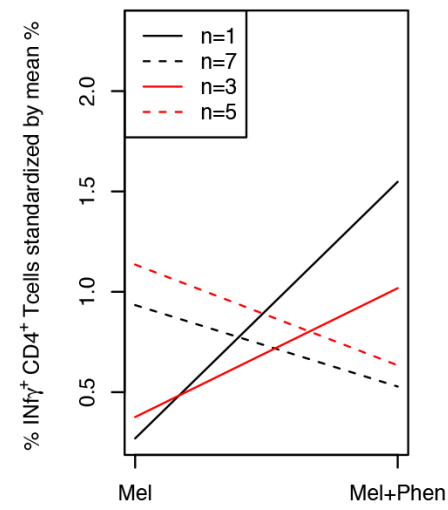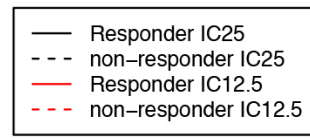

**C****PP**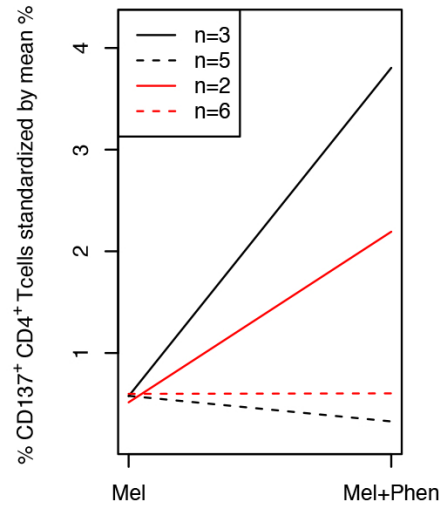**PhP**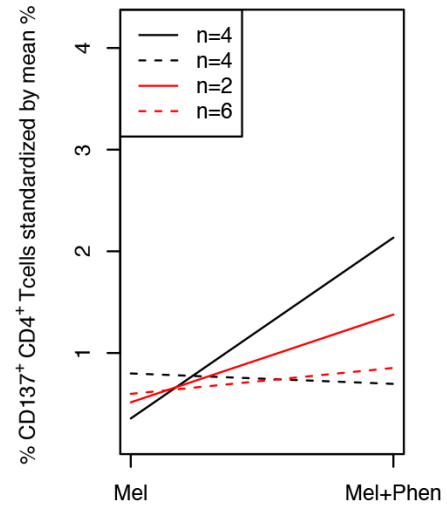**POP**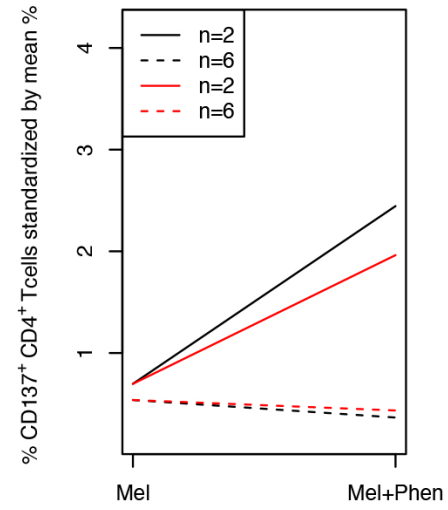**BP**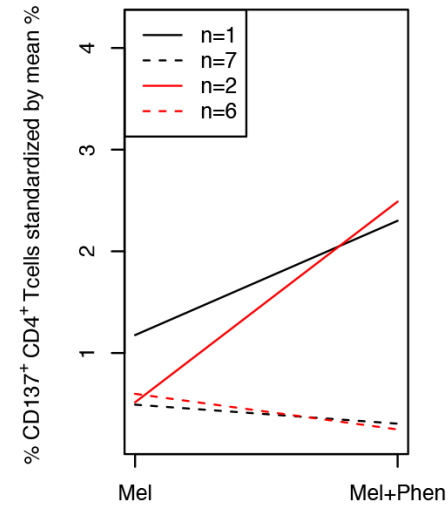**BOP**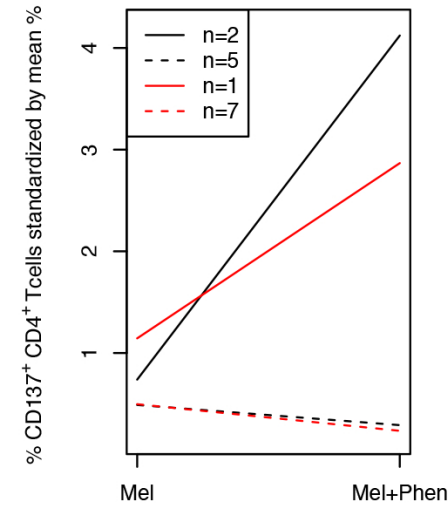**TBP**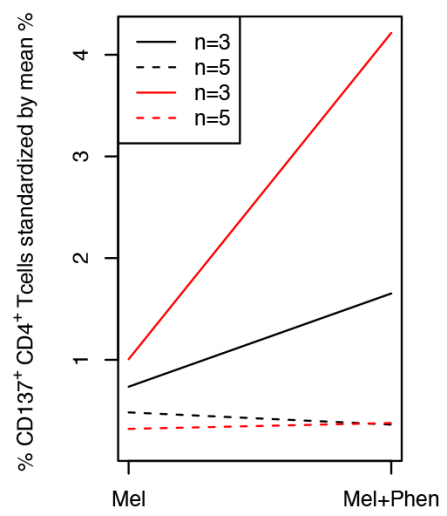**MP**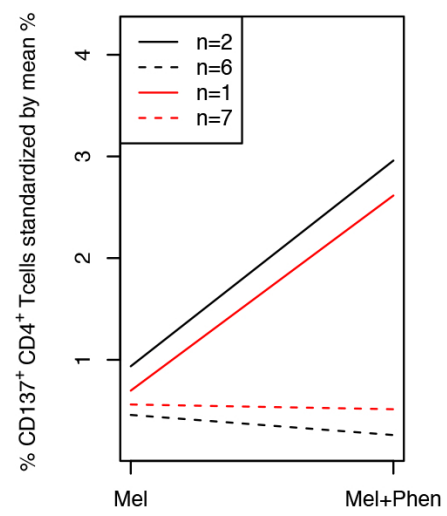**MOP**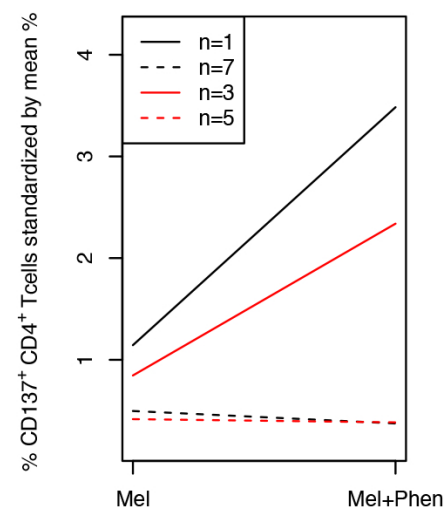**HOP**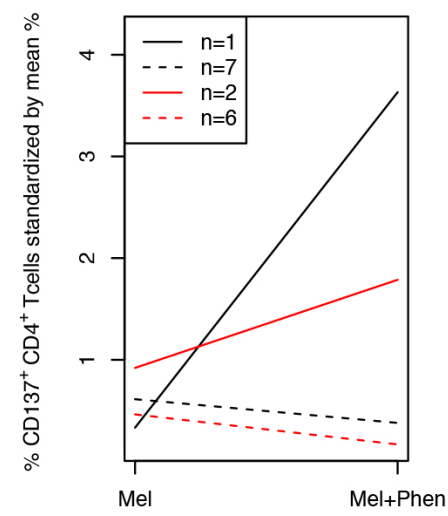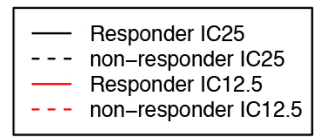

Supplement: PCMR-32-540-s001.pdf [file PCMR-32-540-s001.pdf]
